# Supplementary material for: Deep Learning Diagnostics of Gray Leaf Spot in Maize under Mixed Disease Field Conditions
Source: MDPI journal article supplement (doi:10.3390/plants11151942), 2022-07-26
Supplement: s1 [file s1]

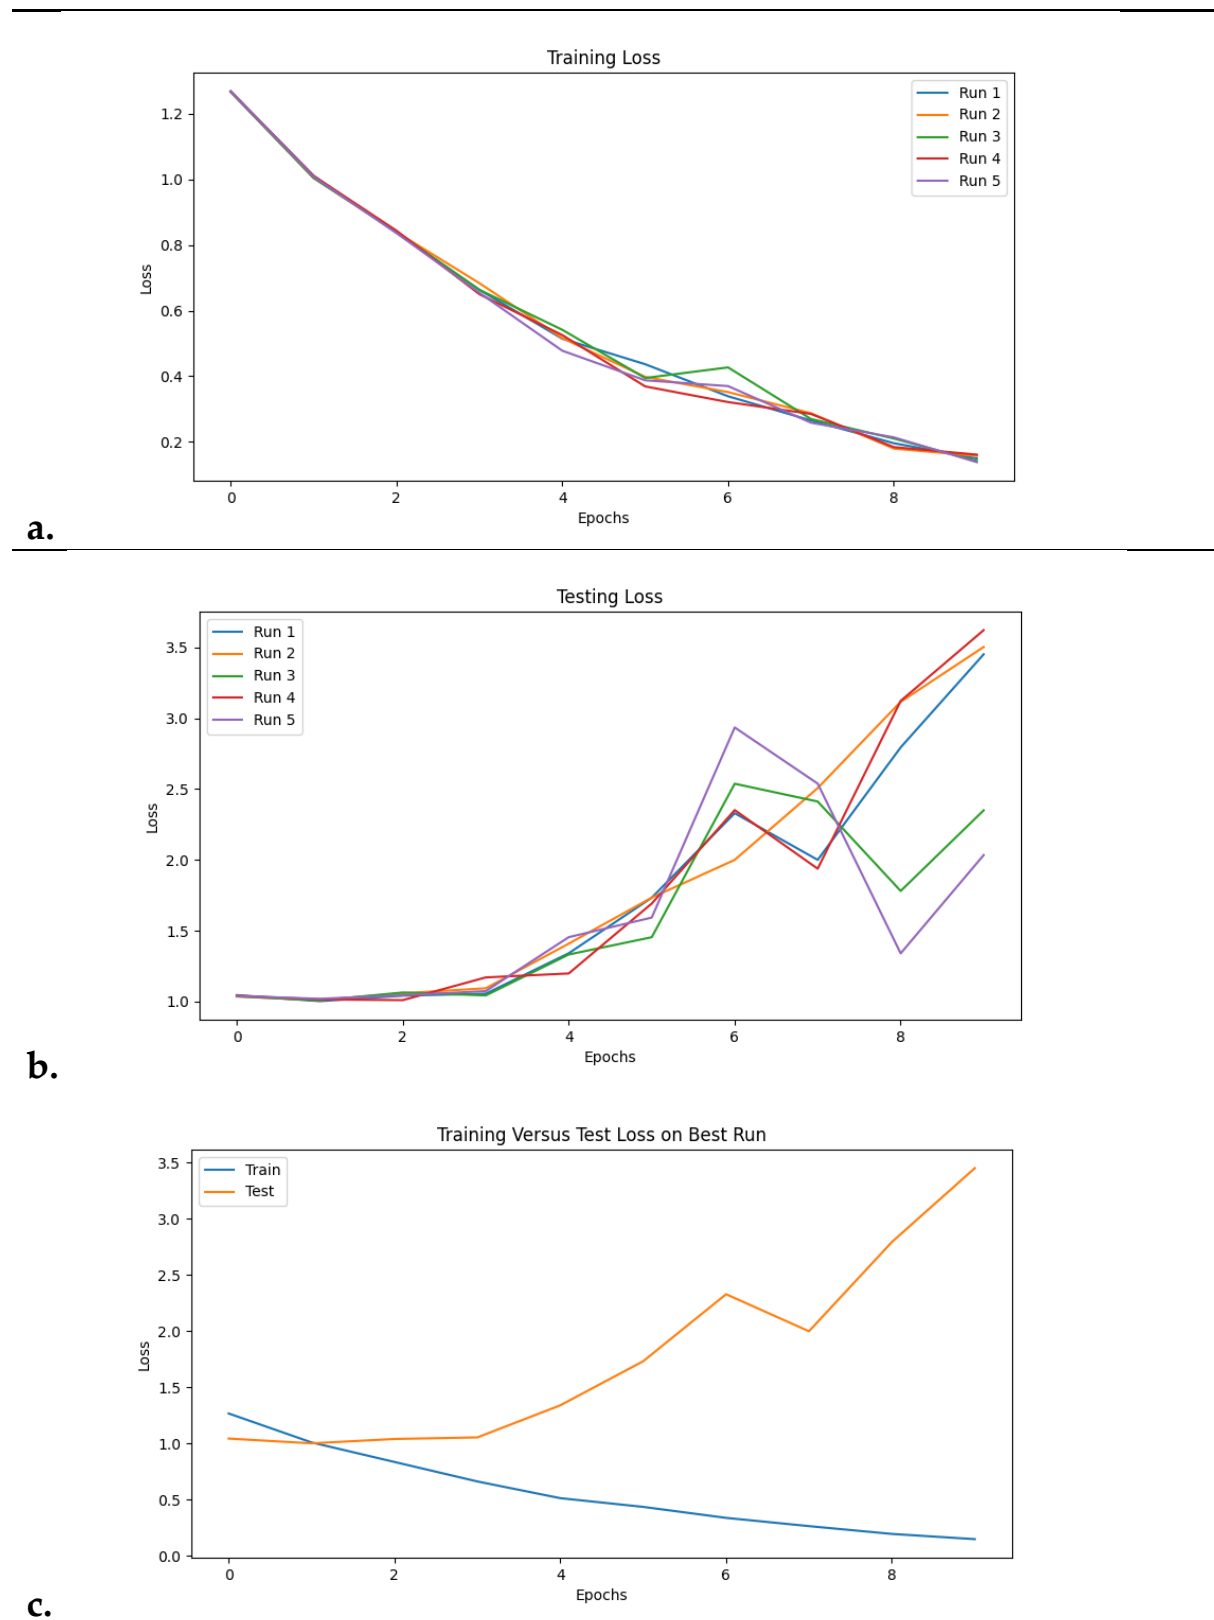

**Figure S1.** GLS\_net performance (a) GLS\_net upon the IF training set across 5 runs of 10 epochs (b) GLS\_net performance upon the IF testing set across 5 runs of 10 epochs. (c) Best GLS\_net model performance upon the IF testing and training set across 10 epochs.

a.

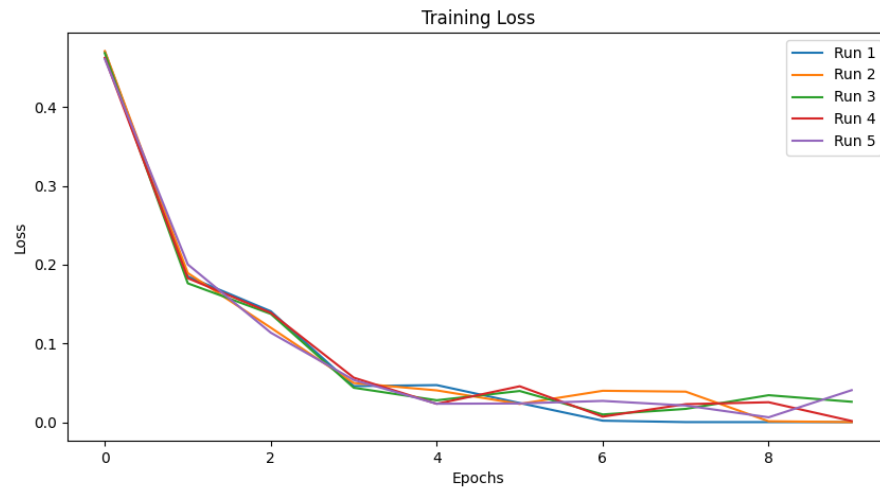

b.

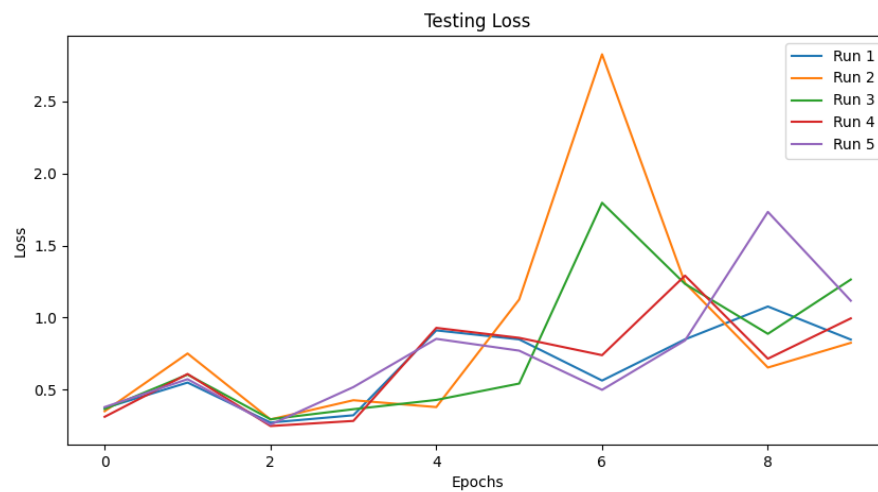

c.

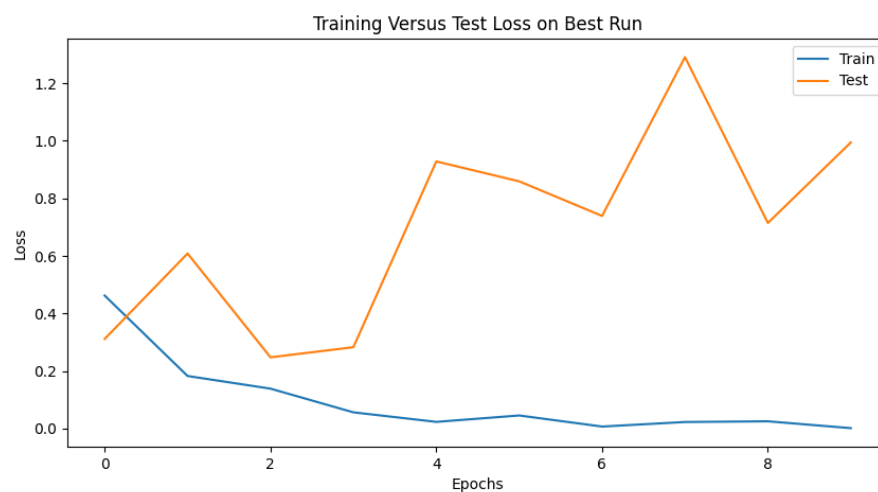

**Figure S2.** GLS\_net\_pv performance (a) GLS\_net\_pv performance upon the PV training set across 5 runs of 10 epochs (b) GLS\_net\_pv performance upon the PV testing set across 5 runs of 10 epochs (c) Best GLS\_net\_pv performance upon the PV training and testing set across 10 epochs.

**Table S1.** Detailed leafRCNN performance upon the IFL testing set

| Metric                     | IoU       | maxDets | maxDets | Score |
|----------------------------|-----------|---------|---------|-------|
| <b>Bounding Box</b>        |           |         |         |       |
| Average Precision          | 0.50:0.95 | all     | 100     | 0.990 |
| Average Precision          | 0.50      | all     | 100     | 0.899 |
| Average Precision          | 0.75      | all     | 100     | 0.990 |
| Average Precision          | 0.50:0.95 | small   | 100     | 0.990 |
| Average Precision          | 0.50:0.95 | med     | 100     | 0.899 |
| Average Precision          | 0.50:0.95 | large   | 100     | 0.990 |
| Average Recall             | 0.50:0.95 | all     | 1       | 0.990 |
| Average Recall             | 0.50:0.95 | small   | 100     | 0.899 |
| Average Recall             | 0.50:0.95 | med     | 100     | 0.990 |
| Average Recall             | 0.50:0.95 | large   | 100     | 0.939 |
| <b>Segmentation (Mask)</b> |           |         |         |       |
| Average Precision          | 0.50:0.95 | all     | 100     | 0.923 |
| Average Precision          | 0.50      | all     | 100     | 1.000 |
| Average Precision          | 0.75      | all     | 100     | 0.977 |
| Average Precision          | 0.50:0.95 | large   | 100     | 0.923 |
| Average Recall             | 0.50:0.95 | all     | 1       | 0.942 |
| Average Recall             | 0.50:0.95 | large   | 100     | 0.944 |

**Area** = Indicates the area in which AR and AP values were calculated. Since leaves in the IFL dataset are quite large and take up most of the area in a image, only AP and AR values for the entire image are shown here

**maxDets** = The maximum number of predicted instances that will be considered. For example: An image may contain 400 predicted instances of class A. Of these, 100 instances of class A will be randomly selected and assessed. The IFL dataset only contains a single instance in each image.

**Table S2.** leafRCNN loss upon the IFL testing set

| Best Loss* | Average Best Loss* | Best Loss Standard Deviation* |
|------------|--------------------|-------------------------------|
| 0.0571     | 0.062              | 0.0308                        |

\*Results are from five separate runs of 10 epochs each.

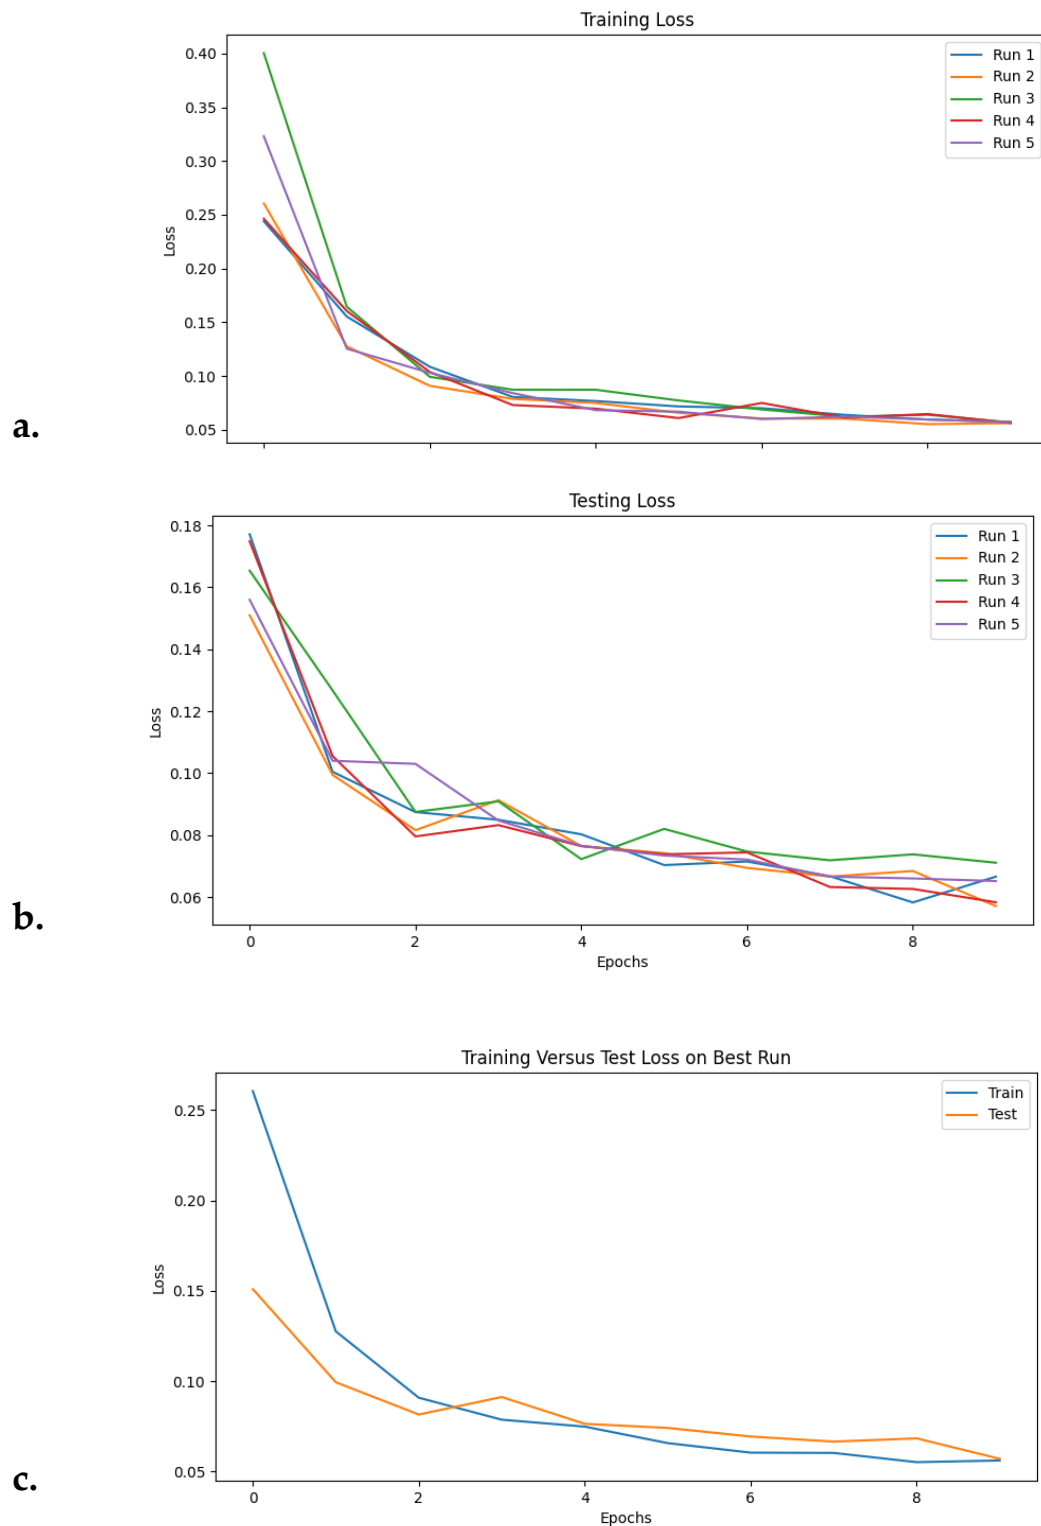

**Figure S3.** leafRCNN performance. (a) leafRCNN performance upon the IFL testing set across 5 separate runs of 10 epochs (b) leafRCNN performance upon the IFL training set across 5 separate runs of 10 epochs (c) Best leafRCNN model performance upon the IFL testing and training set across 10 epochs.

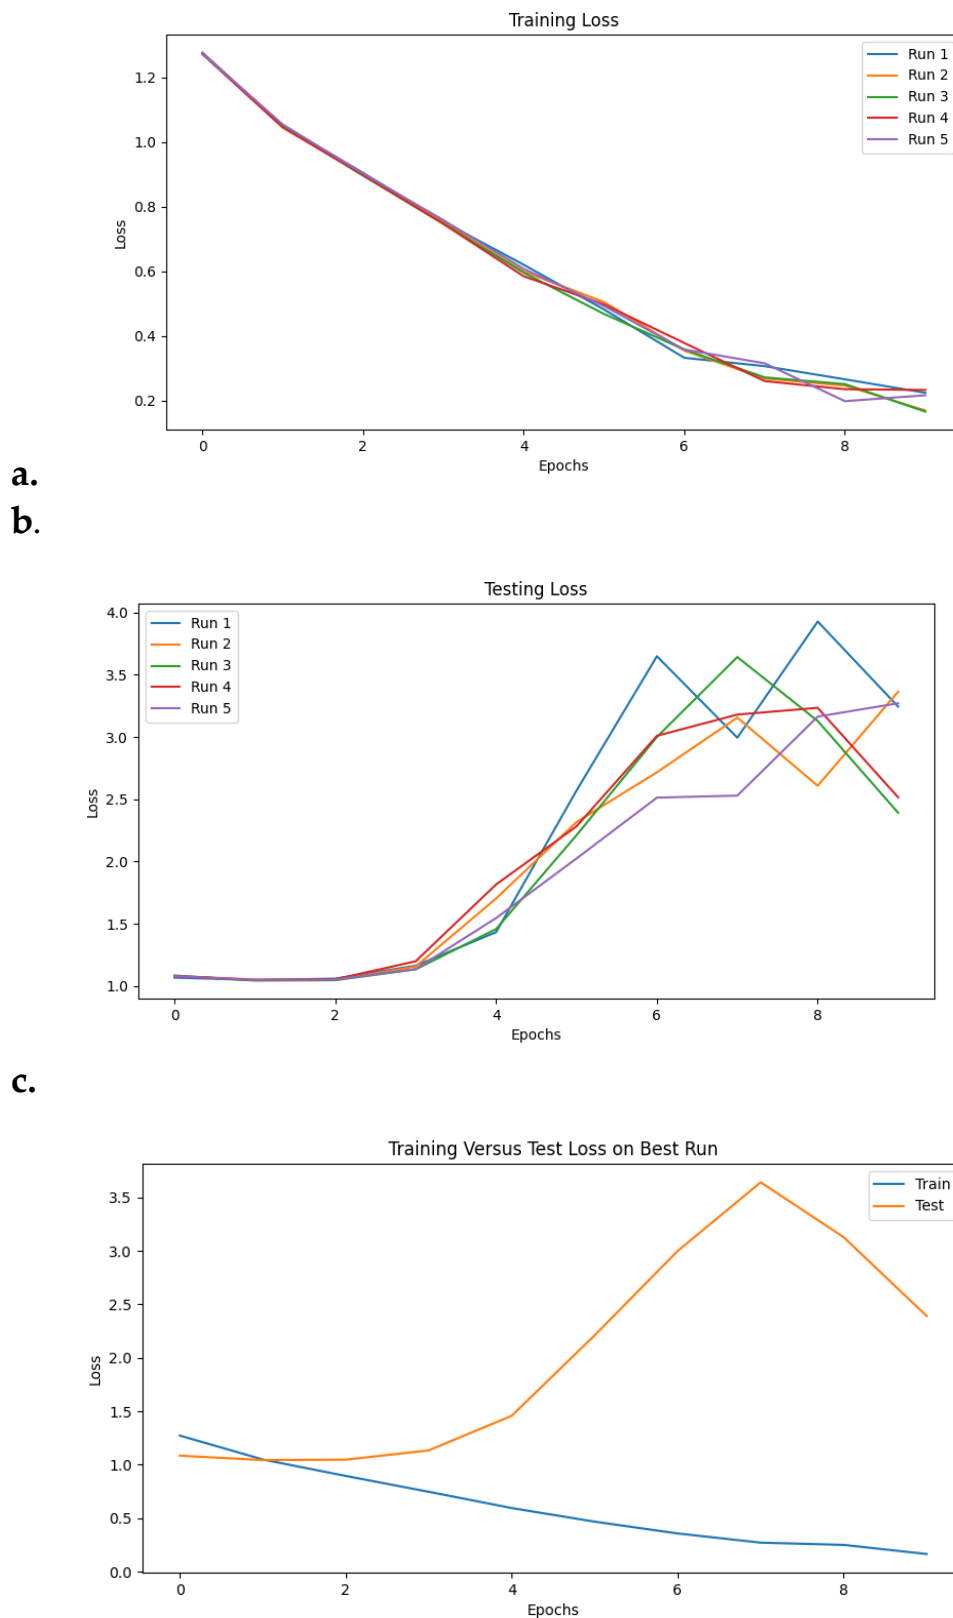

**Figure S4.** GLS\_net\_noBackground performance (a) GLS\_net\_noBackground performance upon the IFNB training set across 5 runs of 10 epochs. (b) GLS\_net\_noBackground performance upon the IFNB testing set across 5 runs of 10 epochs. (c) Best GLS\_net\_noBackground performance upon the IFNB training and testing set across 10 epochs.
